# Supplementary material
Source: HighWire-hosted journal article supplement (https://www.cmajopen.ca/highwire/filestream/88795/field_highwire_adjunct_files/0/open-2022-0027-1-at.pdf)
Supplement: open-2022-0027-1-at.pdf [file open-2022-0027-1-at.pdf]

Supplemental Table 1 Case definitions for outcomes and covariates

| Outcomes              | Database                                                                                | Definition                                                                                                                                                                                                                                                                                                                                                                                                                                                                                                                 |
|-----------------------|-----------------------------------------------------------------------------------------|----------------------------------------------------------------------------------------------------------------------------------------------------------------------------------------------------------------------------------------------------------------------------------------------------------------------------------------------------------------------------------------------------------------------------------------------------------------------------------------------------------------------------|
| All-cause readmission | Discharge Abstract Database<br>National Ambulatory Care Reporting System                | A first re-visit to ED or admission to hospital for any reason in the 90 days following index ED visit                                                                                                                                                                                                                                                                                                                                                                                                                     |
| Stroke readmission    | Discharge Abstract Database                                                             | Admission to hospital with a primary diagnosis of ischemic stroke (ICD-10-CA I63.1, I64.x, H34.1) or intracerebral hemorrhagic stroke (I61.x) in the 90 days following index ED visit                                                                                                                                                                                                                                                                                                                                      |
| Death                 | Ontario Registered Persons Database                                                     | Death within 90 days of index ED visit                                                                                                                                                                                                                                                                                                                                                                                                                                                                                     |
| Telemedicine visit    | Ontario Health Insurance Plan                                                           | Physician billing code - K080, K081, K082, K083, B099A, B100A, B103A, B200A, B203A, B209A                                                                                                                                                                                                                                                                                                                                                                                                                                  |
| Physician visits      | Ontario Health Insurance Plan<br>ICES Physician Database<br>Corporate Provider Database | <p>The type of consultation (family doctor or stroke specialist) in the 28 days after index ED visit.</p> <p>The overall number of healthcare visits with family doctors and stroke specialists in the 90 days after index ED visit.</p> <p>A visit includes one or more services billed for by a unique physician ID on a single calendar day.</p> <p>Family doctor specialty = ‘Family practice and general practice’</p> <p>Stroke specialty = ‘Internal medicine’, ‘Neurology’, ‘Cardiology’, ‘Geriatric medicine’</p> |
| Neuroimaging          | National Ambulatory Care Reporting System<br>Ontario Health Insurance Plan              | <p>Canadian classification of health intervention code (CCI) or physician billing code within 14 days of index ED visit including the index event.</p> <p>CT head: CCI code - 3AN20, 3ER20 or Physician billing code - X188, X400, X401, X402, X405</p>                                                                                                                                                                                                                                                                    |

|                              |                                                                            |                                                                                                                                                                                                                                                                                                                                                                                                                                                                                                                                                                                   |
|------------------------------|----------------------------------------------------------------------------|-----------------------------------------------------------------------------------------------------------------------------------------------------------------------------------------------------------------------------------------------------------------------------------------------------------------------------------------------------------------------------------------------------------------------------------------------------------------------------------------------------------------------------------------------------------------------------------|
|                              |                                                                            | MRI brain: CCI code - 3AN40, 3ER40 or Physician billing code - X421, X422, X425                                                                                                                                                                                                                                                                                                                                                                                                                                                                                                   |
| Neurovascular imaging        | National Ambulatory Care Reporting System<br>Ontario Health Insurance Plan | <p>Canadian classification of health intervention code (CCI) or physician billing code within 14 days of index ED visit including the index event.</p> <p>CT-angiogram: CCI code - 3JE20, 3JX20 or Physician billing code - X404, X417, X408</p> <p>MR-angiogram: CCI code - 3JE40, 3JX40 or Physician billing code - X431, X435</p> <p>Carotid Doppler: CCI code - 3JE30 or Physician billing code - J190, J191, J192, J490, J491, J492, J201, J501, J195, J189, J489</p>                                                                                                        |
| Echocardiogram               | National Ambulatory Care Reporting System<br>Ontario Health Insurance Plan | <p>Canadian classification of health intervention code (CCI) or physician billing code within 14 days of index ED visit including the index event.</p> <p>CCI code - 3IP30 or Physician billing code - G570, G571, G577, G578, G560, G561, G562, G566, G567, G568, G572, G574, G575, G576, G580, G581, G579</p>                                                                                                                                                                                                                                                                   |
| Anti-hypertensive medication | Ontario Drug Benefit                                                       | <p>Individual is considered on an anti-hypertensive at baseline if prescription was dispensed in the 100 days before the index ED visit or up to 7 days after the ED visit and where the days supply encompasses the ED visit date.</p> <p>Includes drugs of sub-class: ACE-inhibitors, angiotensin receptor blockers, beta-blockers, calcium channel blockers, calcium blockers, diuretics, and potassium-sparing diuretics or</p> <p>Drug names: clonidine HCL, doxazosin mesylate, guanethidine monosulfate, prazosin HCL, reserpine, reserpine &amp; hydrochlorothiazide,</p> |

|                               |                                                      | terazosin HCL, methyldopa, methyldopa HCL, prazosin, hydralazine                                                                                                                                                                                                                                                                                                                                                                                                                                                                                                                                     |
|-------------------------------|------------------------------------------------------|------------------------------------------------------------------------------------------------------------------------------------------------------------------------------------------------------------------------------------------------------------------------------------------------------------------------------------------------------------------------------------------------------------------------------------------------------------------------------------------------------------------------------------------------------------------------------------------------------|
| Anti-dyslipidemia medication  | Ontario Drug Benefit                                 | <p>Individual is considered on an anti-dyslipidemia at baseline if prescription was dispensed in the 100 days before the index ED visit or up to 7 days after the ED visit and where the days supply encompasses the ED visit date.</p> <p>Includes drugs of subclass: statins, calcium blockers and anti-lipemic combination, fibrates, or other antilipemic or<br/>Drug names: nicotinic acid, niacin, cholestyramine, cholestyramine resin, cholestyramine resin complex, colestipol HCL</p>                                                                                                      |
| Anti-hyperglycemic medication | Ontario Drug Benefit                                 | <p>Individual is considered on an anti-hyperglycemic at baseline if prescription was dispensed in the 100 days before the index ED visit or up to 7 days after the ED visit and where the days supply encompasses the ED visit date.</p> <p>Includes drugs of subclass: insulins, oral anti-glycemics (including acarbose, acetohexamide, alogliptin, canagliflozin, chlorpropamide, dapagliflozin, gliclazide, glimepiride, glipizide, glyburide, guar gum, linagliptin, metformin, nateglinide, pioglitazone, repaglinide, rosiglitazone, saxagliptin, sitagliptin, tolbutamide, troglitazone)</p> |
| Predictor variables           | Database                                             | Definition                                                                                                                                                                                                                                                                                                                                                                                                                                                                                                                                                                                           |
| Age (continuous)              | Ontario Registered Persons Database                  | ≥ 18 years of age as of index ED visit                                                                                                                                                                                                                                                                                                                                                                                                                                                                                                                                                               |
| Sex                           | Ontario Registered Persons Database                  | Male, Female                                                                                                                                                                                                                                                                                                                                                                                                                                                                                                                                                                                         |
| Neighborhood income quintile  | Statistics Canada Census Postal Code Conversion File | Using the smallest standard geographic area for which census data are disseminated (400-700 persons) to identify a person's                                                                                                                                                                                                                                                                                                                                                                                                                                                                          |

|                     |                                                                                                           |                                                                                                                                                                                                                                                                                                                                   |
|---------------------|-----------------------------------------------------------------------------------------------------------|-----------------------------------------------------------------------------------------------------------------------------------------------------------------------------------------------------------------------------------------------------------------------------------------------------------------------------------|
|                     |                                                                                                           | neighbourhood of residence and the neighbourhood's average income                                                                                                                                                                                                                                                                 |
| Rural home location | Postal Code Conversion File                                                                               | Using the smallest standard geographic area for which census data are disseminated (400-700 persons) to determine the extent of urbanicity of a person's residence<br>Community size = 1 or 2 or 3 'Large urban 100+k'<br>Community size = 4 'Medium urban 10-100k'<br>Community size = 5 or 9 'Small town <10k'                  |
| Hypertension        | Discharge Abstract Database<br>Same Day Surgery Database<br>Ontario Health Insurance Plan                 | Lookback to 1991:<br>≥2 outpatient claims (ICD-9 401.x, 402.x, 403.x, 404.x, or 405.x) in a two-year period, or<br>1 outpatient + 1 hospitalization or day surgery record (ICD-10-CA I10.x, I11.x, I12.x, I13.x, or I15.x) in a two-year period, or<br>If no outpatient record is found, ≥1 hospitalization or day surgery record |
| Diabetes            | Discharge Abstract Database<br>Ontario Health Insurance Plan<br>Ontario Drug Benefit Program              | Lookback to 1991:<br>≥2 outpatient claims (ICD-9 250) in a one-year period, or<br>≥1 hospitalization (ICD-10-CA E10, E11, E13, E14), or<br>≥1 diabetes drug claim in a one-year period                                                                                                                                            |
| Atrial fibrillation | Discharge Abstract Database<br>National Ambulatory Care Reporting System<br>Ontario Health Insurance Plan | Lookback to 1988:<br>1 hospitalization or 1 ED visit (ICD-10-CA I48)<br>or<br>4 outpatient claims (ICD-9 427) in a 1-year period                                                                                                                                                                                                  |
| Dyslipidemia        | Discharge Abstract Database<br>Same Day Surgery Database<br>Ontario Health Insurance Plan                 | Lookback to 1991:<br>1 hospital admission (ICD-9 272 or ICD-10-CA E78 as any diagnosis), or 2 outpatient claims (ICD-9 272) within 2 years, or 1 outpatient claim followed by 1 hospital admission within 2 years                                                                                                                 |
| History of stroke   | Discharge Abstract Database                                                                               | Lookback to 1988:<br>Ischemic stroke: ICD-10-CA I63, I64, H341;<br>ICD-9 434, 436, 362.3 or                                                                                                                                                                                                                                       |

|                           |                                                          |                                                                                                                                                      |
|---------------------------|----------------------------------------------------------|------------------------------------------------------------------------------------------------------------------------------------------------------|
|                           |                                                          | Hemorrhagic stroke: ICD-10-CA I60, I61;<br>ICD-9 430, 431                                                                                            |
| Coronary artery disease   | Discharge Abstract Database<br>Same Day Surgery Database | Lookback to 1988:<br>ICD-10-CA I21, I22, or CCI 1IJ50, 1IJ57GQ, 1IJ54, 1IJ76<br>ICD-9 410 or CCP 4802, 4803, 481                                     |
| Peripheral artery disease | Discharge Abstract Database<br>Same Day Surgery Database | Lookback to 1988:<br>ICD-10-CA I702, I713, I714, I739, I743, I744 or<br>CCI 1JE57, 1JE50, 1JE87<br>ICD-9 4402, 4413, 4414, 4439, 4442 or<br>CCP 5012 |

ED: emergency department, CCI: Canadian classification of health interventions, CCP: Canadian classification of procedures

Supplemental Table 2 Clinic visits and care before and after the implementation of outpatient telemedicine billing codes

|                                                         | <b>Before<br/>telemedicine<br/>n = 40,098</b> | <b>After<br/>telemedicine<br/>n = 7,503</b> | <b>Risk Difference<br/>[95% confidence<br/>intervals]</b> |
|---------------------------------------------------------|-----------------------------------------------|---------------------------------------------|-----------------------------------------------------------|
| <b>At least 1 visit within 28 days n (%)</b>            | 33,353 (83.2%)                                | 6,403 (85.3%)                               | 2.2 [-0.1 , 4.4]                                          |
| <b>Visit type within 28 days n (%)</b>                  |                                               |                                             |                                                           |
| In-person and telemedicine                              | 373 (0.9%)                                    | 2,496 (33.3%)                               | 32.3 [31.0 , 33.6]                                        |
| In-person only                                          | 32,817 (81.8%)                                | 1,284 (17.1%)                               | -64.7 [-66.0 , -63.4]                                     |
| Telemedicine only                                       | 163 (0.4%)                                    | 2,623 (35.0%)                               | 34.6 [33.2 , 35.9]                                        |
| No visits                                               | 6,745 (16.8%)                                 | 1,100 (14.7%)                               | -2.2 [-3.1 , -1.2]                                        |
| <b>At least 1 visit within 90 days n (%)</b>            | 37,254 (92.9%)                                | 7,053 (94.0%)                               | 1.1 [-1.3 , 3.5]                                          |
| <b>Visit type within 90 days n (%)</b>                  |                                               |                                             |                                                           |
| In-person and telemedicine                              | 1,298 (3.2%)                                  | 4,264 (56.8%)                               | 53.6 [51.9 , 55.3]                                        |
| In-person only                                          | 35,723 (89.1%)                                | 817 (10.9%)                                 | -78.2 [-79.4 , -77.0]                                     |
| Telemedicine only                                       | 233 (0.6%)                                    | 1,972 (26.3%)                               | 25.7 [24.5 , 26.9]                                        |
| No visits                                               | 2,844 (7.1%)                                  | 450 (6.0%)                                  | -1.1 [-1.7 , -0.5]                                        |
| <b>Family doctor visits within 90 days n (%)</b>        |                                               |                                             |                                                           |
| 0                                                       | 8,753 (21.8%)                                 | 1,802 (24.0%)                               | 2.2 [1.0 , 3.4]                                           |
| 1                                                       | 10,218 (25.5%)                                | 1,572 (21.0%)                               | -4.5 [-5.7 , -3.4]                                        |
| 2                                                       | 8,728 (21.8%)                                 | 1,369 (18.2%)                               | -3.5 [-4.6 , -2.5]                                        |
| 3+                                                      | 12,400 (30.9%)                                | 2,760 (36.8%)                               | 5.9 [4.4 , 7.3]                                           |
| <b>Stroke specialist visits within 90 days n (%)</b>    |                                               |                                             |                                                           |
| 0                                                       | 9,235 (23.0%)                                 | 1,432 (19.1%)                               | -3.9 [-5.0 , -2.9]                                        |
| 1                                                       | 16,564 (41.3%)                                | 2,740 (36.5%)                               | -4.8 [-6.3 , -3.3]                                        |
| 2                                                       | 9,211 (23.0%)                                 | 1,860 (24.8%)                               | 1.8 [0.6 , 3.0]                                           |
| 3+                                                      | 5,088 (12.7%)                                 | 1,471 (19.6%)                               | 6.9 [5.9 , 8.0]                                           |
| <b>Brain imaging in ED n (%)</b>                        | 32,597 (81.3%)                                | 6,161 (82.1%)                               | 0.8 [-1.4 , 3.1]                                          |
| <b>Brain imaging within 14 days n (%)</b>               | 36,728 (91.6%)                                | 6,930 (92.4%)                               | 0.8 [-1.6 , 3.1]                                          |
| <b>Vascular imaging in ED n (%)</b>                     | 10,246 (25.6%)                                | 3,691 (49.2%)                               | 23.6 [22.0 , 25.3]                                        |
| <b>Vascular imaging within 14 days n (%)</b>            | 30,006 (74.8%)                                | 6,300 (84.0%)                               | 9.1 [6.9 , 11.4]                                          |
| <b>Echocardiogram within 90 days n (%)</b>              | 21,054 (52.5%)                                | 3,952 (52.7%)                               | 0.2 [-1.6 , 2.0]                                          |
| <b>Medications refilled within 100 days<sup>a</sup></b> |                                               |                                             |                                                           |
| Anti-hypertensives n/N (%)                              | 19,042/20,652<br>(92.2%)                      | 3,529/3,827<br>(92.2%)                      | 0.0 [-3.3 , 3.3]                                          |
| Anti-hyperlipidemia agent n/N (%)                       | 15,510/17,320<br>(89.5%)                      | 3,076/3,388<br>(90.8%)                      | 1.2 [-2.3 , 4.7]                                          |
| Anti-hyperglycemic n/N (%)                              | 5,237/5,737<br>(91.3%)                        | 1,068/1,146<br>(92.8%)                      | 1.5 [-4.6 , 7.6]                                          |

ED: emergency department

<sup>a</sup> Denominators reflect number of patients aged >65 years on the medication at baseline

Supplemental Table 3 Patient characteristics comparing patients who had at least one ambulatory clinic visit within 28 days of emergency department discharge to those without visits before and after the implementation of outpatient telemedicine billing codes

|                                           | Before telemedicine*<br>n = 39,562 |                        |         | After telemedicine<br>n = 7,503 |                        |                          |         |
|-------------------------------------------|------------------------------------|------------------------|---------|---------------------------------|------------------------|--------------------------|---------|
|                                           | In-person only<br>n = 32,817       | No visits<br>n = 6,745 | p-value | In-person only<br>n = 1,284     | No visits<br>n = 1,100 | ≥ 1 Telemed<br>n = 5,119 | p-value |
| <b>Median age (IQR), yrs</b>              | 72 (62, 81)                        | 75 (63, 85)            | <0.001  | 73 (63, 81)                     | 73 (62, 83)            | 73 (63, 81)              | 0.007   |
| <b>Age group n (%)</b>                    |                                    |                        |         |                                 |                        |                          |         |
| 18-45 years                               | 1,350 (4.1%)                       | 344 (5.1%)             | <0.001  | 50 (3.9%)                       | 52 (4.7%)              | 220 (4.3%)               | <0.001  |
| 46-65 years                               | 9,315 (28.4%)                      | 1,663 (24.7%)          |         | 334 (26.0%)                     | 298 (27.1%)            | 1,440 (28.1%)            |         |
| 66-75 years                               | 8,527 (26.0%)                      | 1,448 (21.5%)          |         | 344 (26.8%)                     | 263 (23.9%)            | 1,410 (27.5%)            |         |
| 76-85 years                               | 8,911 (27.2%)                      | 1,685 (25.0%)          |         | 388 (30.2%)                     | 279 (25.4%)            | 1,387 (27.1%)            |         |
| >85 years                                 | 4,714 (14.4%)                      | 1,605 (23.8%)          |         | 168 (13.1%)                     | 208 (18.9%)            | 662 (12.9%)              |         |
| <b>Female sex n (%)</b>                   | 16,118 (49.1%)                     | 3,404 (50.5%)          | 0.043   | 603 (47.0%)                     | 541 (49.2%)            | 2,538 (49.6%)            | 0.244   |
| <b>Neighborhood Income Quintile n (%)</b> |                                    |                        |         |                                 |                        |                          |         |
| 1 (lowest)                                | 6,779 (20.7%)                      | 1,704 (25.3%)          | <0.001  | 258 (20.1%)                     | 273 (24.8%)            | 934 (18.2%)              | <0.001  |
| 2                                         | 6,911 (21.1%)                      | 1,454 (21.6%)          |         | 290 (22.6%)                     | 211 (19.2%)            | 1,039 (20.3%)            |         |
| 3                                         | 6,603 (20.1%)                      | 1,315 (19.5%)          |         | 249 (19.4%)                     | 226 (20.5%)            | 1,031 (20.1%)            |         |
| 4                                         | 6,084 (18.5%)                      | 1,141 (16.9%)          |         | 256 (19.9%)                     | 184 (16.7%)            | 996 (19.5%)              |         |
| 5 (highest)                               | 6,356 (19.4%)                      | 1,087 (16.1%)          |         | 227-232                         | 201-206                | 1,104 (21.6%)            |         |
| Missing                                   | 84 (0.3%)                          | 44 (0.7%)              |         | †                               | †                      | 15 (0.3%)                |         |
| <b>Residence n (%)</b>                    |                                    |                        |         |                                 |                        |                          |         |
| ‘Large urban 100+k’                       | 25,288 (77.1%)                     | 4,174 (61.9%)          | <0.001  | 827 (64.4%)                     | 657 (59.7%)            | 4,001 (78.2%)            | <0.001  |
| ‘Medium urban 10-100k’                    | 3,364 (10.3%)                      | 1,079 (16.0%)          |         | 212 (16.5%)                     | 182 (16.5%)            | 454 (8.9%)               |         |
| ‘Small town <10k’                         | 4,165 (12.7%)                      | 1,492 (22.1%)          |         | 245 (19.1%)                     | 261 (23.7%)            | 664 (13.0%)              |         |
| <b>Most responsible diagnosis n (%)</b>   |                                    |                        |         |                                 |                        |                          |         |
| Ischemic stroke                           | 7,804 (23.8%)                      | 2,072 (30.7%)          | <0.001  | 312 (24.3%)                     | 366 (33.3%)            | 1,193 (23.3%)            | <0.001  |
| Transient ischemic attack                 | 25,013 (76.2%)                     | 4,673 (69.3%)          |         | 972 (75.7%)                     | 734 (66.7%)            | 3,926 (76.7%)            |         |
| <b>ED Hospital type</b>                   |                                    |                        |         |                                 |                        |                          |         |
| Comprehensive stroke centre               | 6,885 (21.0%)                      | 1,144 (17.0%)          | <0.001  | 352 (27.4%)                     | 239 (21.7%)            | 1,167 (22.8%)            | <0.001  |
| Primary stroke centre                     | 5,805 (17.7%)                      | 1,150 (17.0%)          |         | 223 (17.4%)                     | 263 (23.9%)            | 972 (19.0%)              |         |
| Non-designated stroke centre              | 20,127 (61.3%)                     | 4,451 (66.0%)          |         | 709 (55.2%)                     | 598 (54.4%)            | 2,980 (58.2%)            |         |
| <b>Hypertension n (%)</b>                 | 23,142 (70.5%)                     | 4,737 (70.2%)          | 0.6351  | 839 (65.3%)                     | 730 (66.4%)            | 3,426 (66.9%)            | 0.553   |

|                                        |                |               |        |             |             |               |        |
|----------------------------------------|----------------|---------------|--------|-------------|-------------|---------------|--------|
| <b>Diabetes n (%)</b>                  | 10,152 (30.9%) | 2,140 (31.7%) | 0.2    | 395 (30.8%) | 348 (31.6%) | 1,624 (31.7%) | 0.801  |
| <b>Atrial fibrillation n (%)</b>       | 5,588 (17.0%)  | 1,332 (19.7%) | <0.001 | 181 (14.1%) | 179 (16.3%) | 843 (16.5%)   | 0.114  |
| <b>Dyslipidemia n (%)</b>              | 13,360 (40.7%) | 2,440 (36.2%) | <0.001 | 454 (35.4%) | 368 (33.5%) | 2,058 (40.2%) | <0.001 |
| <b>History of stroke n (%)</b>         | 3,115 (9.5%)   | 1,034 (15.3%) | <0.001 | 104 (8.1%)  | 155 (14.1%) | 456 (8.9%)    | <0.001 |
| <b>Coronary artery disease n (%)</b>   | 4,820 (14.7%)  | 1,023 (15.2%) | 0.312  | 162 (12.6%) | 160 (14.5%) | 662 (12.9%)   | 0.300  |
| <b>Peripheral artery disease n (%)</b> | 1,056 (3.2%)   | 300 (4.4%)    | <0.001 | 36 (2.8%)   | 32 (2.9%)   | 126 (2.5%)    | 0.249  |

\*Patients with telemedicine visits in the 2015-2020 “before telemedicine” period are censored due to small numbers.

† Censored due to small numbers.



Supplemental Figure 1 Vascular imaging within 14 days of the emergency department visit (including imaging done in the emergency department) by fiscal years

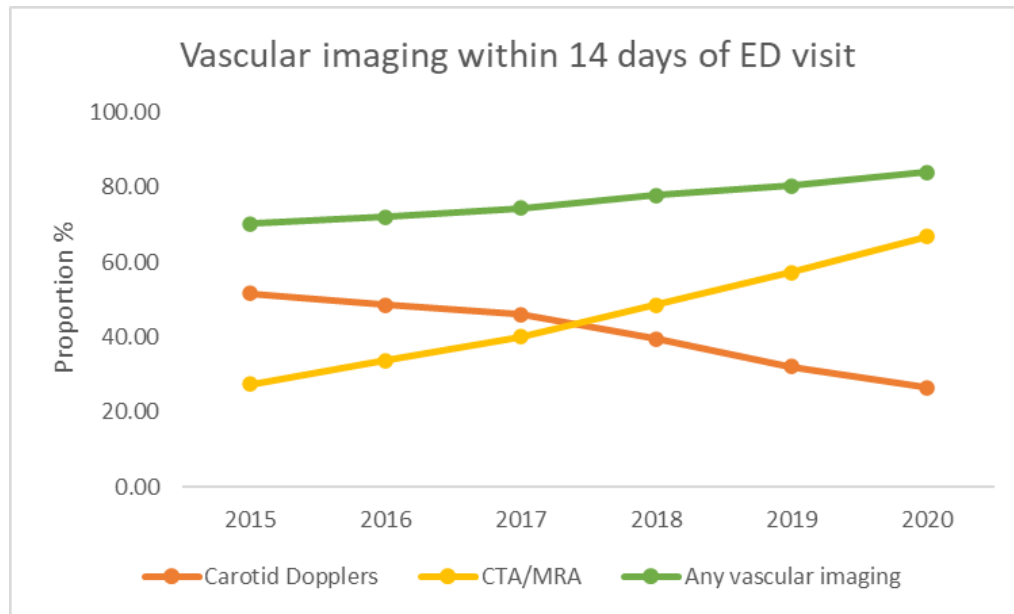

CTA: computed tomography angiography, MRA: magnetic resonance angiography
